# Supplementary material for: Adsorption Removal of Mo(VI) from an Aqueous Solution by Alumina with the Subsequent Regeneration of the Adsorbent
Source: MDPI journal article supplement (doi:10.3390/ijms24108700), 2023-05-12
Supplement: s1 [file s1]

## Supplementary Materials

Alexandra Yu. Kurmysheva <sup>1,\*</sup>, Marina D. Vedenyapina <sup>2</sup>, Stanislav A. Kulaishin <sup>2</sup>,  
Pavel Podrabinnik <sup>1,3</sup>, Nestor Washington Solís Pinargote <sup>1</sup>, Anton Smirnov <sup>1</sup>, Alexander S. Metel <sup>3</sup>,  
José F. Bartolomé <sup>4</sup> and Sergey N. Grigoriev <sup>1,3</sup>

<sup>1</sup> Laboratory of Electric Current Assisted Sintering Technologies, Moscow State University of Technology "STANKIN", Vadkovsky per. 1, 127055 Moscow, Russia;  
p.podrabinnik@stankin.ru (P.P.); nw.solis@stankin.ru (N.W.S.P.); a.smirnov@stankin.ru (A.S.); s.grigoriev@stankin.ru (S.N.G.)

<sup>2</sup> N. D. Zelinsky Institute of Organic Chemistry, Russian Academy of Sciences, Leninsky Prospect 47,  
119991 Moscow, Russia; mvedenyapina@yandex.ru (M.D.V.); s.kulaishin@mail.ru (S.A.K.)

<sup>3</sup> Department of High-Efficiency Machining Technologies, Moscow State University of Technology, "STANKIN", Vadkovsky per. 1, 127055 Moscow, Russia; a.metel@stankin.ru

<sup>4</sup> Instituto de Ciencia de Materiales de Madrid (ICMM), Consejo Superior de Investigaciones Científicas (CSIC), c/Sor Juna Inés de la Cruz, 3, Cantoblanco, 28049 Madrid, Spain;  
jbartolo@icmm.csic.es

\* Correspondence: a.kurmysheva@stankin.ru

**Table S1.** Kinetic models for the removal of molybdate using Al<sub>2</sub>O<sub>3</sub>.

| C <sub>0</sub> Mo<br>(VI), mg/l | IPD                                       |                       |                |                                           |                       |                | Elovich equation       |         |                |
|---------------------------------|-------------------------------------------|-----------------------|----------------|-------------------------------------------|-----------------------|----------------|------------------------|---------|----------------|
|                                 | k <sub>p1</sub> , mg/g min <sup>1/2</sup> | C <sub>1</sub> , mg/g | R <sup>2</sup> | k <sub>p2</sub> , mg/g min <sup>1/2</sup> | C <sub>2</sub> , mg/g | R <sup>2</sup> | α, mg/(g·min)          | β, g/mg | R <sup>2</sup> |
| 100                             | 1.009                                     | 0.208                 | 0.931          | 0.04                                      | 4.125                 | 0.784          | 1.143x10 <sup>9</sup>  | 5.96    | 0.993          |
| 300                             | 3.106                                     | 0.629                 | 0.933          | 0.077                                     | 12.89                 | 0.722          | 2.186x10 <sup>15</sup> | 2.985   | 0.997          |
| 500                             | 2.566                                     | 0.993                 | 0.903          | 0.07                                      | 21.524                | 0.857          | 42.437                 | 0.378   | 0.838          |
| 700                             | 2.75                                      | 1.204                 | 0.943          | 0.054                                     | 27.429                | 0.552          | 15.24                  | 0.255   | 0.86           |
| 1000                            | 2.967                                     | 1.673                 | 0.932          | 0.149                                     | 28.637                | 0.774          | 17.51                  | 0.234   | 0.868          |

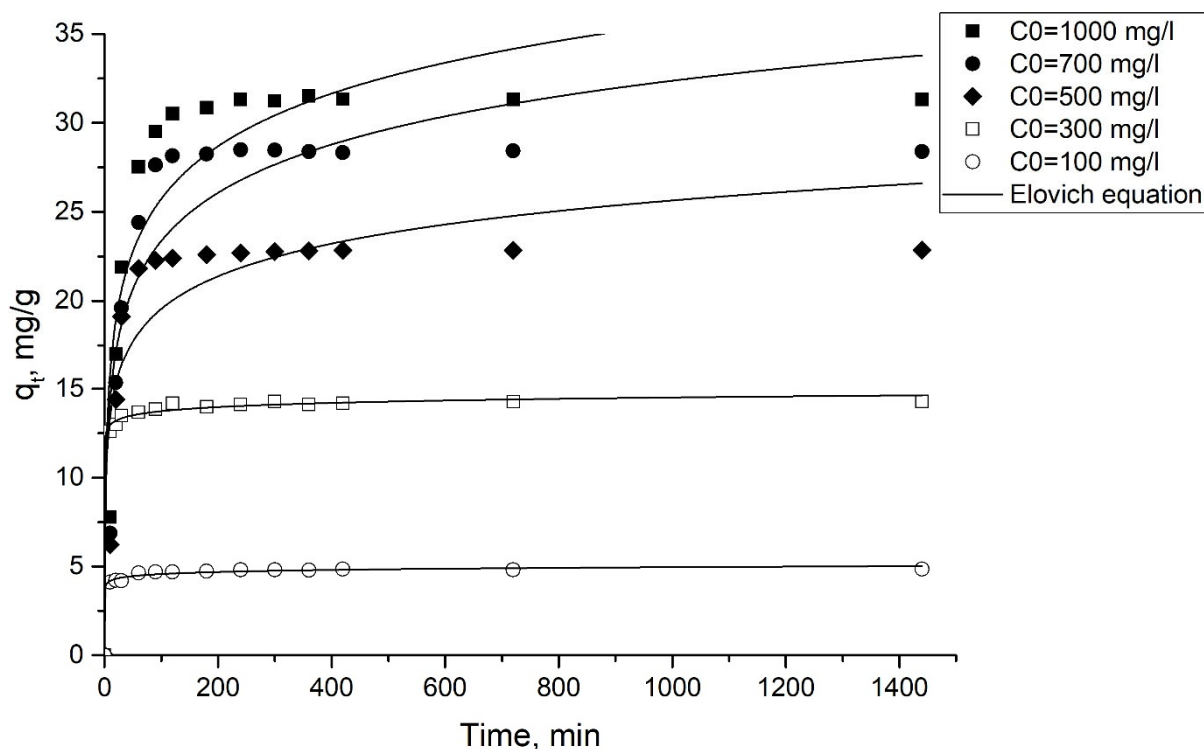

**Figure S1.** Elovich kinetic model for the adsorption of Mo(VI) on the Al<sub>2</sub>O<sub>3</sub>.

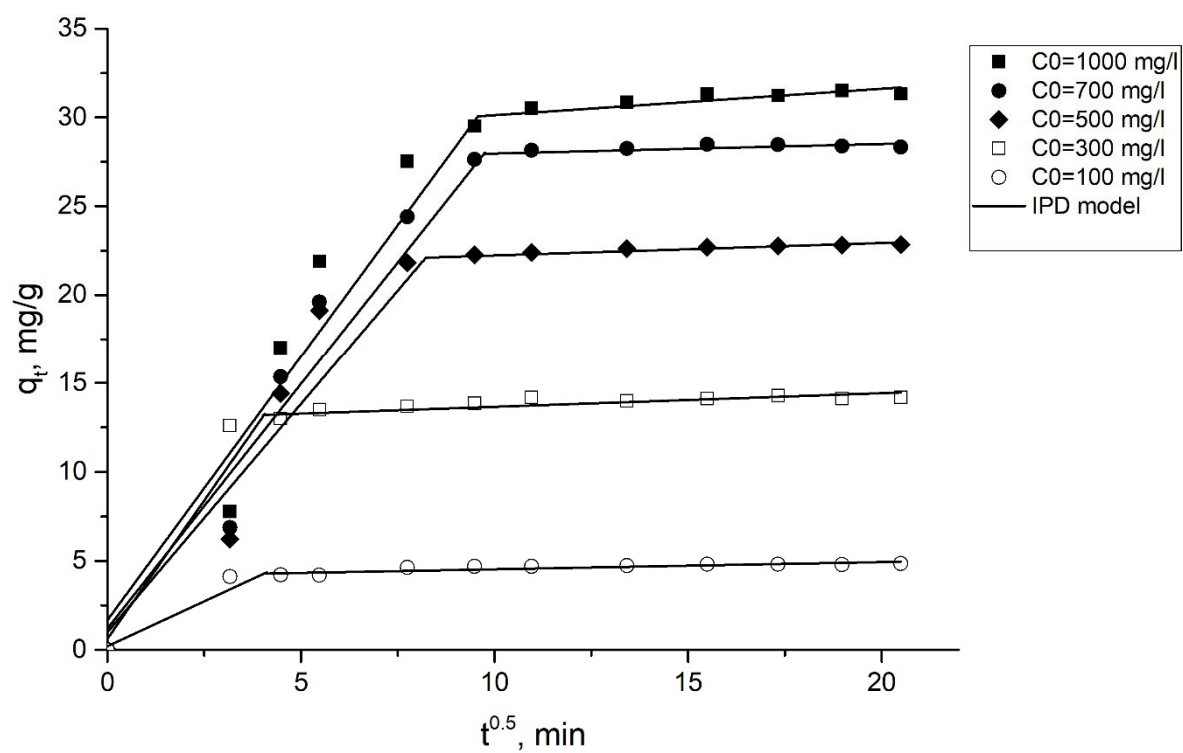

**Figure S2.** Intra-particle diffusion kinetic model for the adsorption of Mo(VI) on the Al<sub>2</sub>O<sub>3</sub>. Time up to 720 minutes.
